# Supplementary material
Source: PubMed Central journal article supplement (PMC5728147)
Supplement: ba008078-suppl1.pdf [file ba008078-suppl1.pdf]

# FIGURE SUPPLEMENTAL 1

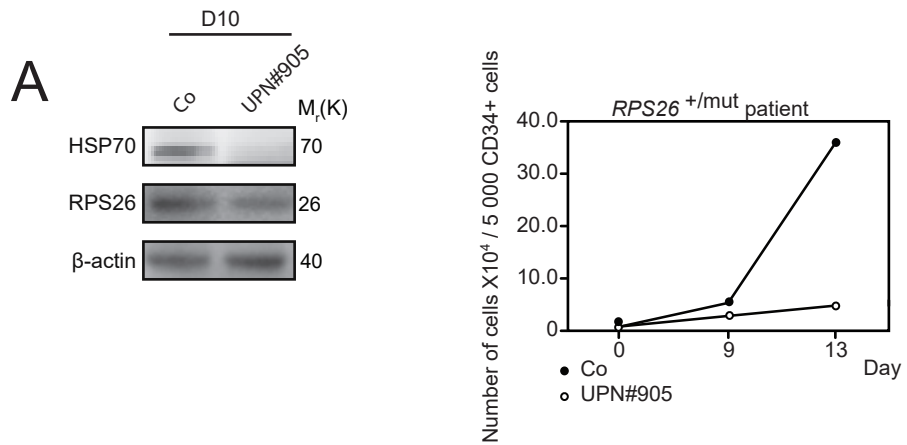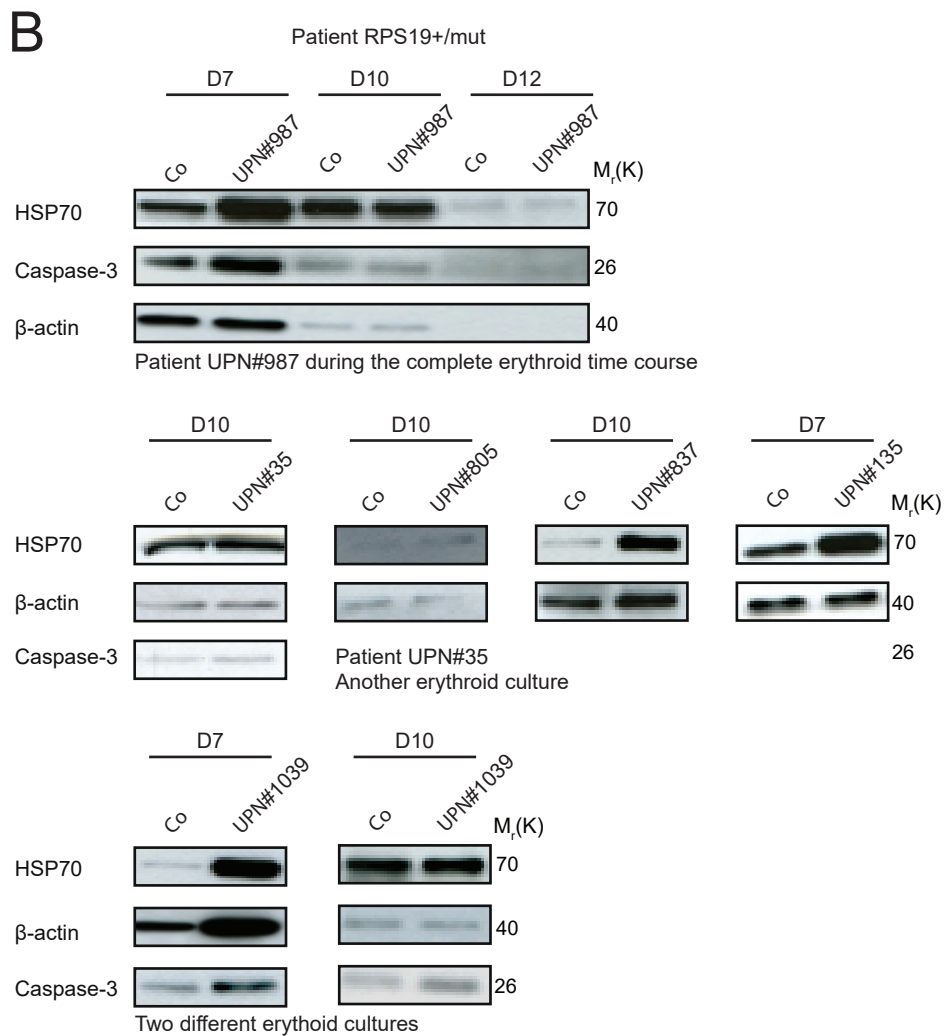

# FIGURE SUPPLEMENTAL 2

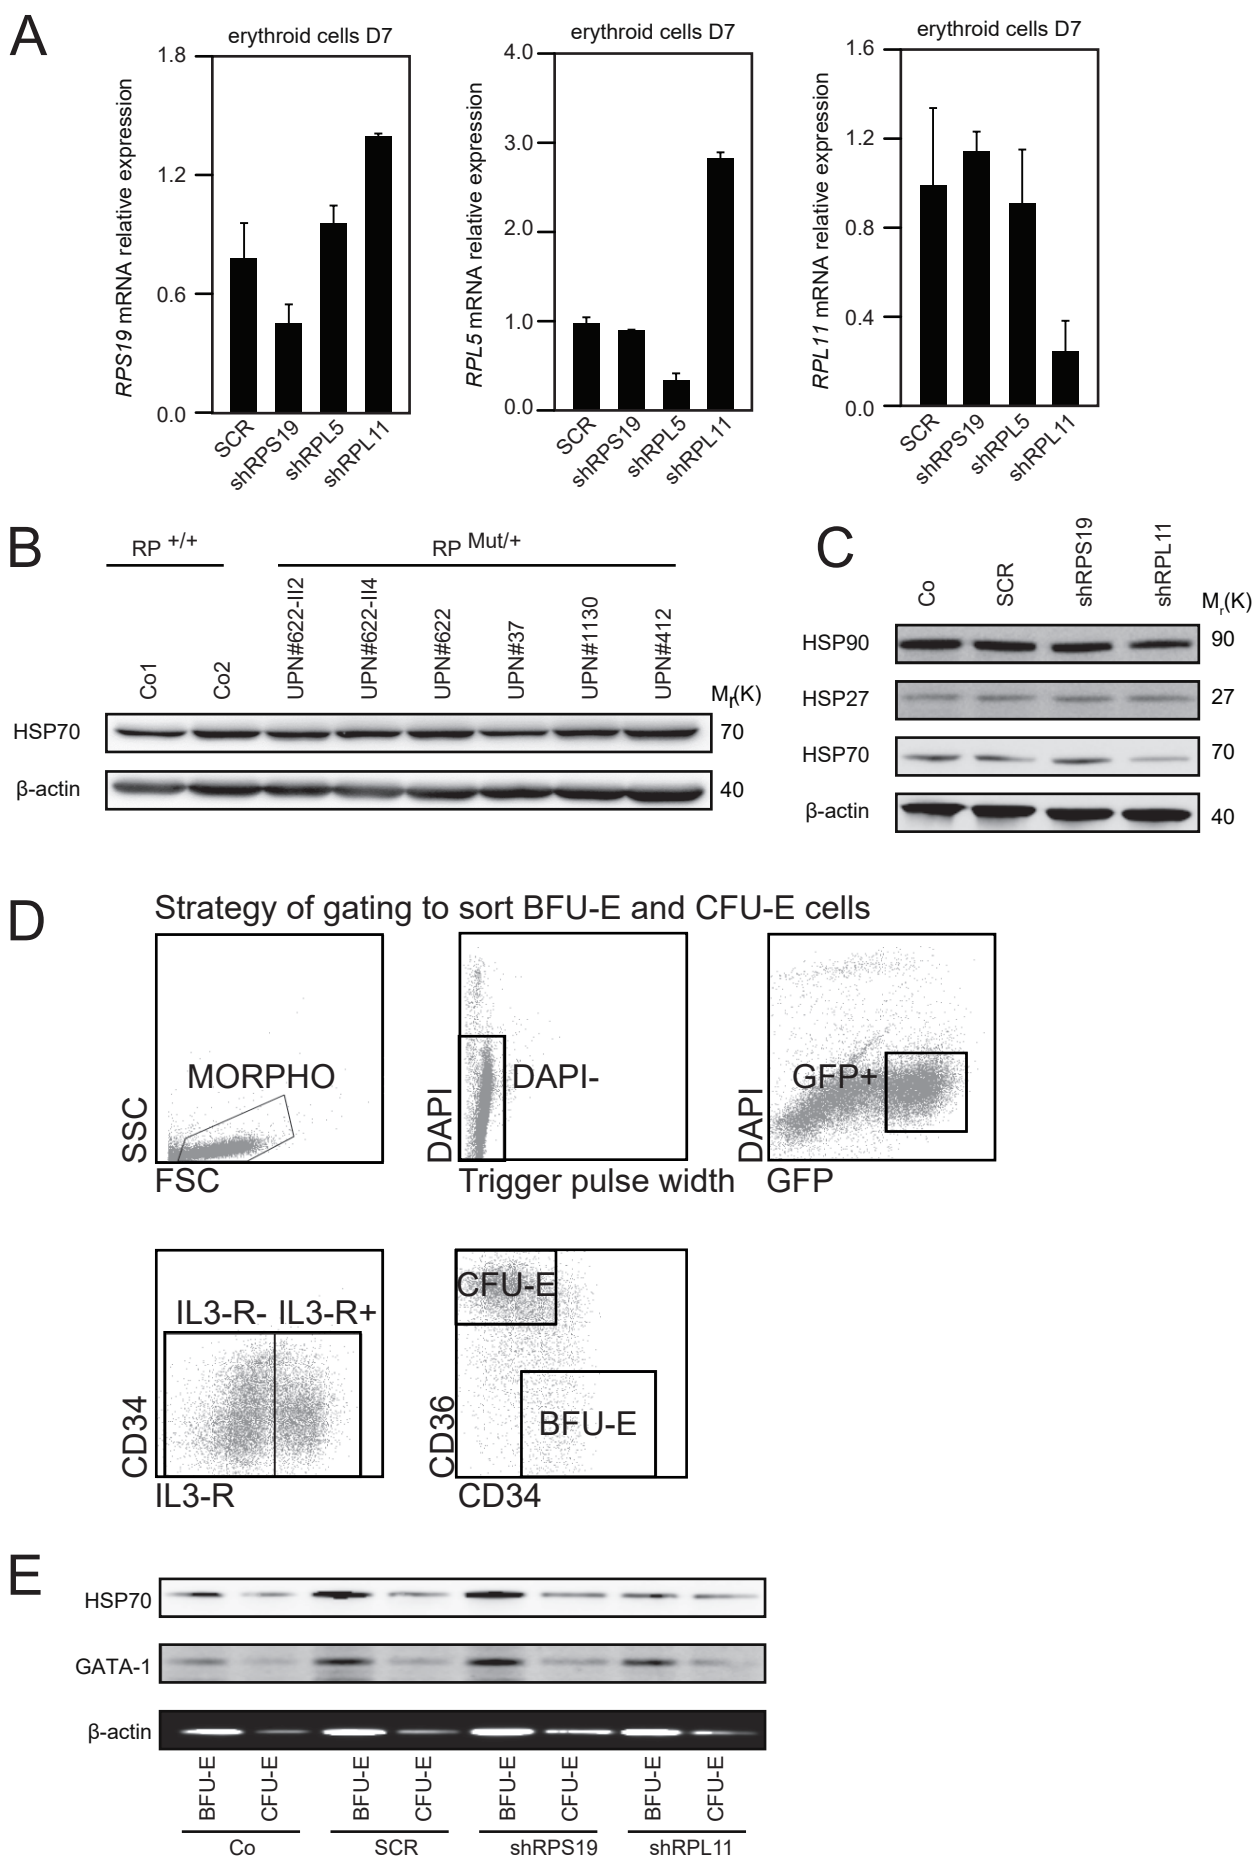

# FIGURE SUPPLEMENTAL 3

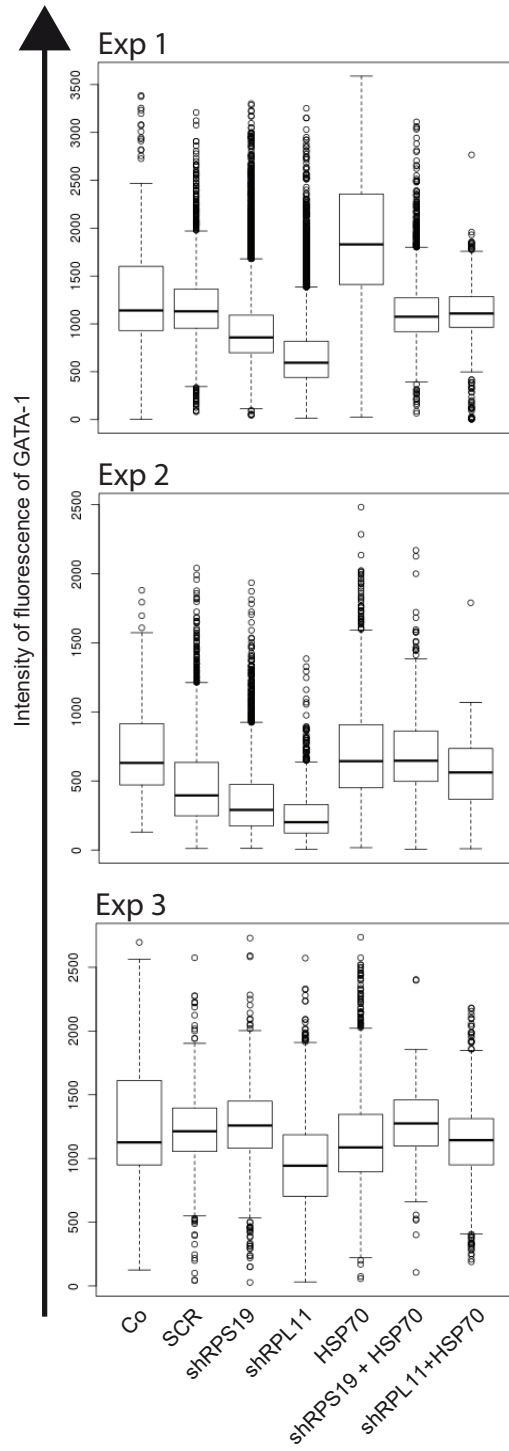

# FIGURE SUPPLEMENTAL 4

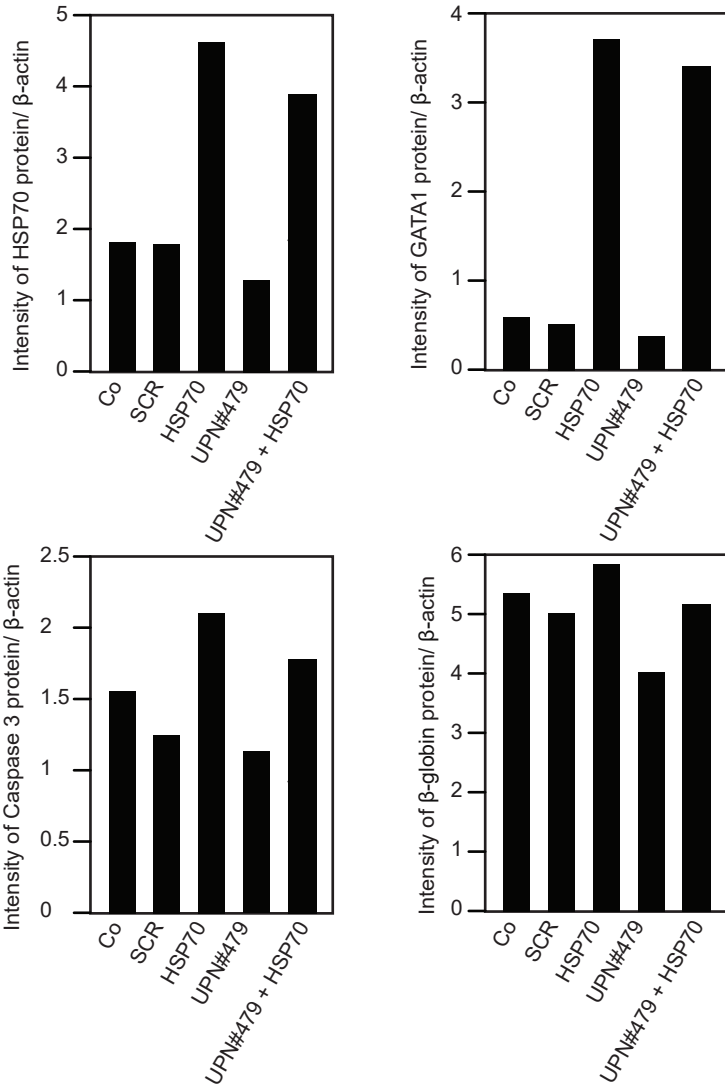

# FIGURE SUPPLEMENTAL 5

## A

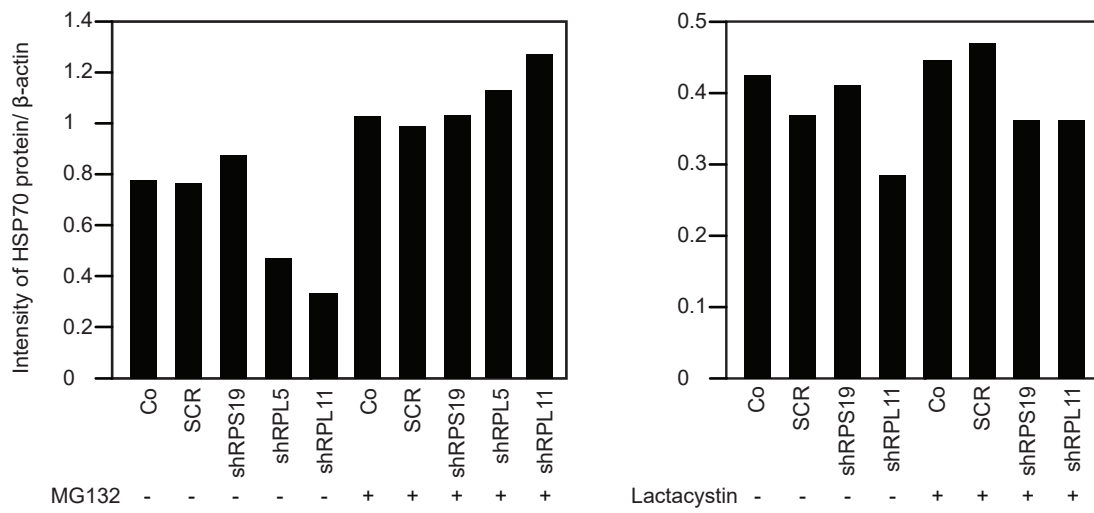

## B

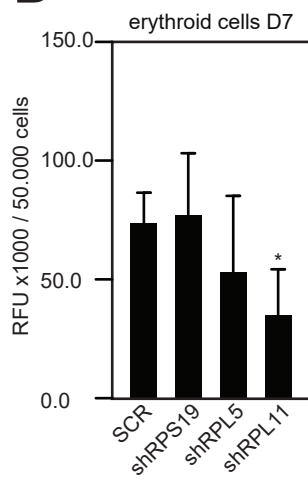

**Supplemental Figure 6: Putative sites of ubiquitination in Human HSP70 protein sequence.**

➤ **Analysis Tool#1 UbPred (The Rockefeller University)**

<http://www.ubpred.org/cgi-bin/ubpred/ubpred.cgi>

```
>sp|P08107|HSP71_HUMAN Heat shock 70 kDa protein 1A/1B OS=Homo sapiens
GN=HSPA1A PE=1
MAKAAAIGIDLGTTYSCVGVFQHGKVEIANDQGNRTTPSYVAFTDTERLIGDAA
KNQVALNPQNTVFDAKRLIGRKFQDPVVQSDMKHWPFQVINDGDKPKVQVSYK
GETKAFYPEEISSMVLTKMKEIAEAYLGPVTNAVITVPA YFNDSQRQATKDAG
VIAGLNVLRINEPTAAAIAYGLDRTGKGERNVLIFDLGGGTFDVSILTIDDGIFEV
KATAGDTHLGGEDFDNRLVNHFVEEFKRKHKKDISQNKRAVRRRLRTACERAKR
TLSSSTQASLEIDSLFEGIDFYTSITRARFEELCSDLFRSTLEPVEKALRDAKLDKA
QIHDLVLVGGSTRIPKVQKLLQDFNGRDLNKSNPDEAVAYGAAVQAAILMGD
KSENVQDLLLLDVAPLSLGLLETAGGVMTALIKRNSTIPTKQTQIFTTYSNDNPGV
LIQVYEGERAMTKDNNLLGRFELSGIPPAPRGVPQIEVTFDIDANGILNVTATDKS
TGKANKITITNDKGRLSKEEIERMVQEAEKYKAEDEVQRERVSAKNALESYAFN
MKSAREDEGLKGISEADKKKVLDCQEVISWLDANTLAEKDEFEHKRKELEQ
VCNPIISGLYQGAGGPGPGGFGAQQPKGGSGSGPTIEEVD
```

The lysin K labeled in gray has been rule out as a putative ubiquitinylation site. The table below describes only the sites from a low to high confidence in the HSP70 ubiquitination site prediction.

| Residue | Score | Ubiquitinated         |
|---------|-------|-----------------------|
| 3       | 0.72  | Yes Medium confidence |
| 108     | 0.68  | Yes Low confidence    |
| 112     | 0.63  | Yes Low confidence    |
| 451     | 0.62  | Yes Low confidence    |
| 512     | 0.65  | Yes Low confidence    |
| 524     | 0.86  | Yes High confidence   |
| 526     | 0.86  | Yes High confidence   |
| 539     | 0.80  | Yes Medium confidence |
| 550     | 0.84  | Yes High confidence   |
| 559     | 0.68  | Yes Low confidence    |
| 561     | 0.69  | Yes Medium confidence |
| 589     | 0.75  | Yes Medium confidence |
| 595     | 0.69  | Yes Medium confidence |
| 597     | 0.68  | Yes Low confidence    |

|     |      |     |                   |
|-----|------|-----|-------------------|
| 628 | 0.75 | Yes | Medium confidence |
|-----|------|-----|-------------------|

**Legend:**

| Label             | Score range             | Sensitivity | Specificity |
|-------------------|-------------------------|-------------|-------------|
| Low confidence    | $0.62 \leq s \leq 0.69$ | 0.464       | 0.903       |
| Medium confidence | $0.69 \leq s \leq 0.84$ | 0.346       | 0.950       |
| High confidence   | $0.84 \leq s \leq 1.00$ | 0.197       | 0.989       |

➤ **Analysis Tool#2 Gbase (Harvard University)**

<https://gbase.hms.harvard.edu/protein/view/IPI:IPI00304925.5>

IPI:IPI00304925.5

Protein Information

**Protein** IPI:IPI00304925.5  
**Gene Symbol** HSPA1A;HSPA1B  
**Protein Description** Heat shock 70 kDa protein 1  
**Sequence Length** 641  
**Mwt** 70009.037 Da

**Sequence** MAKAAAIGID LGTTYSCVGV FQHGKVEIIA NDQGNRTTPS YVAFTDTERL  
IGDAAKNQVA LNPQNTVFDA KRLIGRKFGE PVVQSDMKHW PFQVINDGDK  
PKVQVSYKGE TKAFYPEEIS SMVLTKMKEI AEAYLGYPVT NAVITVPAYF  
NDSQRQATKD AGVIAGLNVL RIINEPTAAA IAYGLDRTGK GERNVLIFDL  
GGGTFDVSIL TIDDGIFEVK ATAGDTHLGG EDFDNRLVNH FVEEFKRKHK  
KDISQNKRAV RRLRTACERA KRTLSSSTQA SLEIDSLFEG IDFYTSITRA  
RFEELCSDLF RSTLEPVEKA LRDAKLDKAQ IHDLVLVGGG TRIPKVQKLL  
QDFFNDRDLN KSINPDEAVA YGAAVQAAIL MGDKSENVQD LLLLDVAPLS  
LGLETAGGVM TALIKRNSTI PTKQTQIFTT YSDNQPGVLI QVYEGERAMT  
KDNNLLGRFE LSGIPPAPRG VPQIEVTFDI DANGILNVTA TDKSTGKANK  
ITITNDKGRL SKEEIERMVQ EAEKYKAEDE VQRERVSAKN ALESYAFNMK  
SAVEDEGLKG KISEADKKKV LDKCQEVISW LDANTLAEKD EFEHKRKELE  
QVCNPIISGL YQGAGGPGPG GFQAQGPKGG SGSGPTIEEV D

The predict ubiquitination sites 108, 112, 451, 512, 524, 526, 539, 550, 559, 561, 597, and 628 are redondant in both analyses.
